# Supplementary material
Source: PubMed Central journal article supplement (PMC7188563)

# Supplementary Figure S1

A

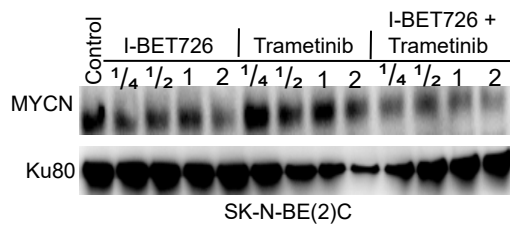

B

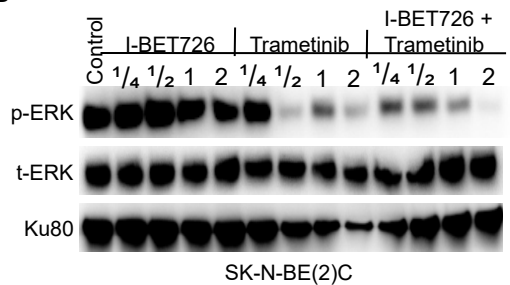

C

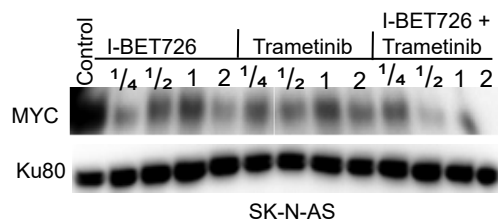

D

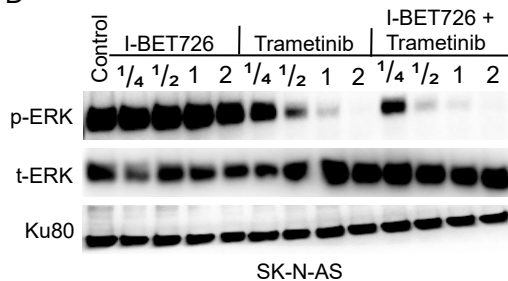

Supplementary Figure S2

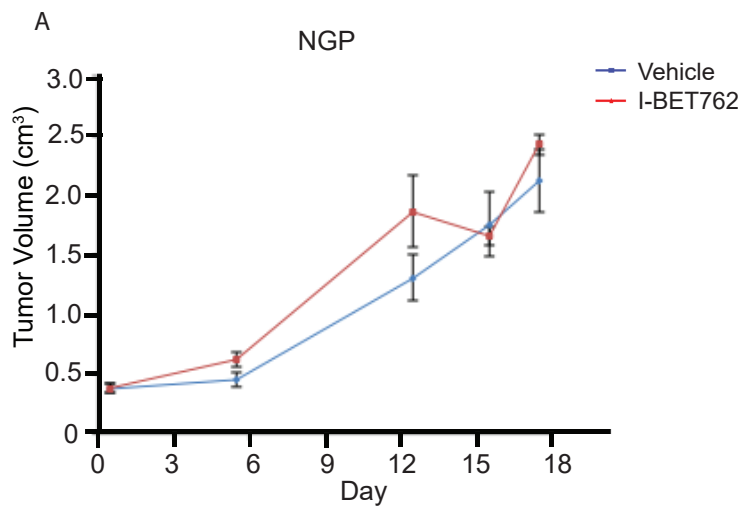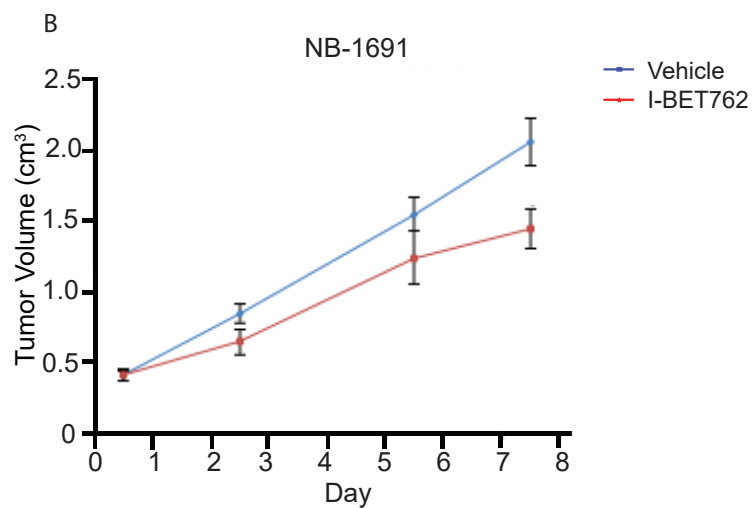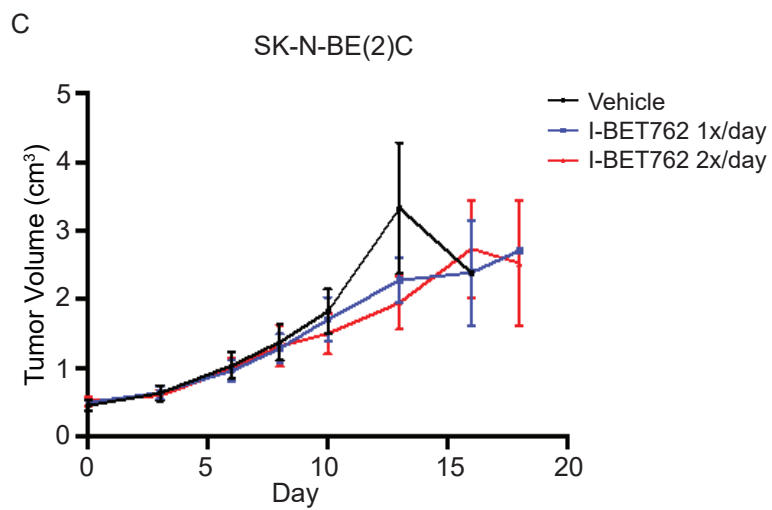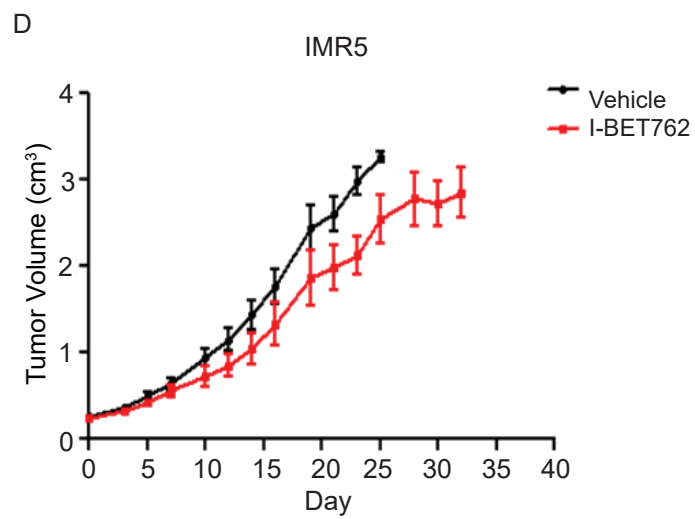

Supplement: NIHMS1575468-supplement-supp_info.pdf [file NIHMS1575468-supplement-supp_info.pdf]
